# Supplementary material for: Stability Study of Algerian Nigella sativa Seeds Stored under Different Conditions
Source: Hindawi journal article supplement (doi:10.1155/2017/7891434), 2017-01-01
Supplement: f1 [file 7891434.f1.pdf]

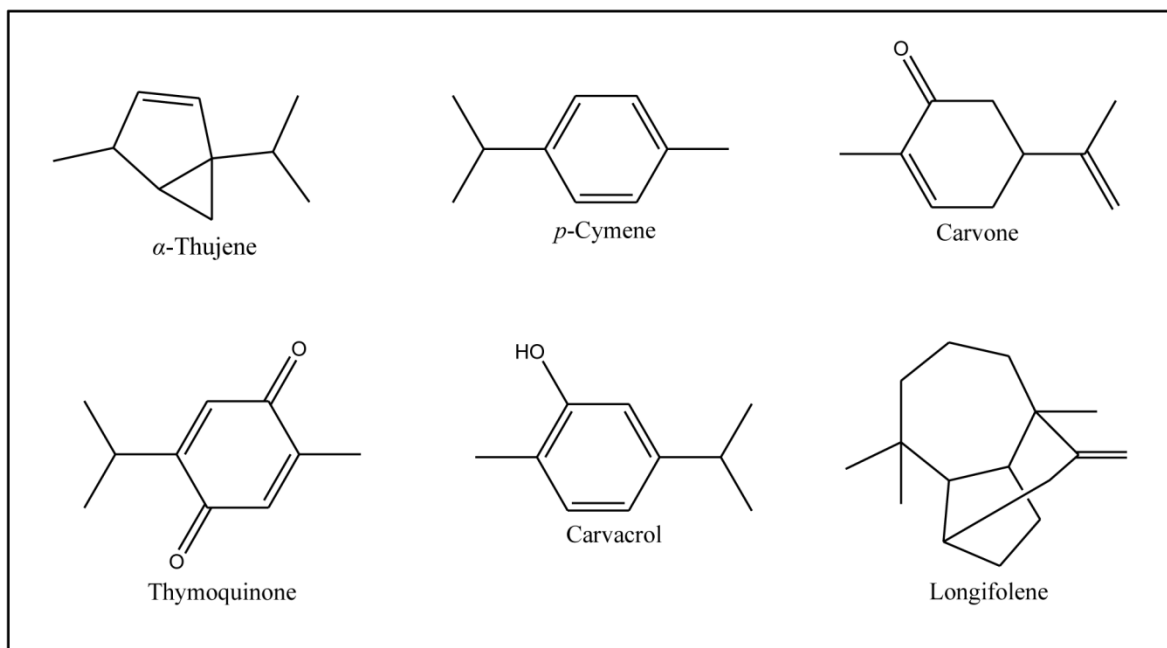

**Supplementary Material 1** Chemical structures of *N. sativa* seeds main constituents  
(source: Liu *et al.*, 2011)

**NIGELLA SATIVA SEEDS**

- Whole seeds
- Ground seeds

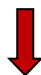

**CONDITION OF STORAGES**

| Condition | Whole seeds | Ground Seeds | Vial        | Nitrogen | Light  |
|-----------|-------------|--------------|-------------|----------|--------|
| A         | 1/3         | -            | Amber       | -        | -      |
| B         | Full        | -            | Amber       | -        | -      |
| C         | Full        | -            | Transparent | -        | -      |
| D         | 1/3         | -            | Amber       | Flush    | -      |
| E         | -           | 1/3          | Amber       | -        | -      |
| F         | -           | Full         | Amber       | -        | -      |
| G         | -           | 1/3          | Amber       | Flush    | -      |
| H         | 1/3         | -            | Amber       | -        | Expose |

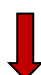

**STORAGE TIME POINTS**

- 1 day
- 14 days
- 28 days

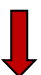

**GC/MS ANALYSIS (HEAD SPACE)**

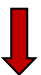

**MULTIVARIATE DATA ANALYSIS (MVDA)**

# 1 Supplementary Material 3 Peak area (10x<sup>7</sup>) of selected constituents

| Storage time              | Peak area of constituents (10x <sup>7</sup> ) |                            |                            |                            |                           |                           |
|---------------------------|-----------------------------------------------|----------------------------|----------------------------|----------------------------|---------------------------|---------------------------|
|                           | α- Thujene                                    | p-Cymene                   | Carvone                    | Thymoquinone               | Carvacrol                 | Longifolene               |
| <b>Condition A</b>        |                                               |                            |                            |                            |                           |                           |
| A0 (1 <sup>st</sup> day)  | 6.617±1.074 <sup>a</sup>                      | 26.239±3.638 <sup>a</sup>  | 8.041±1.363 <sup>a</sup>   | 10.535±2.100 <sup>a</sup>  | 6.292±0.980 <sup>a</sup>  | 2.967±0.441 <sup>a</sup>  |
| A1 (14 <sup>th</sup> day) | 3.233±0.517 <sup>b</sup>                      | 12.542±1.540 <sup>b</sup>  | 4.235±0.628 <sup>b</sup>   | 5.062±0.928 <sup>b</sup>   | 4.426±1.201 <sup>b</sup>  | 1.561±0.222 <sup>b</sup>  |
| A2 (28 <sup>th</sup> day) | 8.782±0.122 <sup>c</sup>                      | 2.682±0.244 <sup>c</sup>   | 0.820±0.094 <sup>c</sup>   | 0.981±0.139 <sup>c</sup>   | 8.880±0.078 <sup>c</sup>  | 0.446±0.094 <sup>c</sup>  |
| <b>Condition B</b>        |                                               |                            |                            |                            |                           |                           |
| B0 (1 <sup>st</sup> day)  | 6.348±0.820 <sup>a</sup>                      | 26.297±4.633 <sup>a</sup>  | 11.216±4.811 <sup>a</sup>  | 12.130±4.198 <sup>a</sup>  | 11.828±2.453 <sup>a</sup> | 3.963±1.678 <sup>a</sup>  |
| B1 (14 <sup>th</sup> day) | 4.821±1.982 <sup>a</sup>                      | 20.999±8.988 <sup>a</sup>  | 6.544±2.751 <sup>a</sup>   | 6.934±2.738 <sup>b</sup>   | 7.851±2.958 <sup>b</sup>  | 2.660±1.151 <sup>a</sup>  |
| B2 (28 <sup>th</sup> day) | 0.809±0.240 <sup>b</sup>                      | 2.541±0.703 <sup>b</sup>   | 0.766±0.279 <sup>b</sup>   | 0.764±0.209 <sup>c</sup>   | 0.644±0.125 <sup>c</sup>  | 0.401±0.099 <sup>b</sup>  |
| <b>Condition C</b>        |                                               |                            |                            |                            |                           |                           |
| C0 (1 <sup>st</sup> day)  | 5.969±2.128 <sup>a</sup>                      | 23.006±4.940 <sup>a</sup>  | 7.486±1.333 <sup>a</sup>   | 9.140±1.407 <sup>a</sup>   | 6.015±1.738 <sup>a</sup>  | 2.642±0.471 <sup>ab</sup> |
| C1 (14 <sup>th</sup> day) | 6.752±2.560 <sup>a</sup>                      | 26.297±13.758 <sup>a</sup> | 9.697±8.936 <sup>a</sup>   | 7.380±5.127 <sup>a</sup>   | 7.257±5.236 <sup>a</sup>  | 3.812±2.864 <sup>b</sup>  |
| C2 (28 <sup>th</sup> day) | 11.826±7.063 <sup>b</sup>                     | 52.429±13.802 <sup>b</sup> | 27.798±15.660 <sup>b</sup> | 22.436±14.947 <sup>a</sup> | 19.279±9.459 <sup>b</sup> | 7.394±2.735 <sup>bc</sup> |
| <b>Condition D</b>        |                                               |                            |                            |                            |                           |                           |
| D0 (1 <sup>st</sup> day)  | 6.797±0.899 <sup>a</sup>                      | 25.625±2.935 <sup>a</sup>  | 8.906±1.104 <sup>a</sup>   | 7.053±1.289 <sup>a</sup>   | 14.659±1.237 <sup>a</sup> | 3.501±0.399 <sup>a</sup>  |
| D1 (14 <sup>th</sup> day) | 7.885±0.828 <sup>a</sup>                      | 29.919±4.001 <sup>a</sup>  | 10.787±3.753 <sup>a</sup>  | 12.958±4.182 <sup>a</sup>  | 13.291±3.866 <sup>a</sup> | 4.285±1.464 <sup>a</sup>  |

|                           |                               |                                 |                            |                            |                             |                             |
|---------------------------|-------------------------------|---------------------------------|----------------------------|----------------------------|-----------------------------|-----------------------------|
| D2 (28 <sup>th</sup> day) | 13.018±1.179 <sup>b</sup>     | 49.105±4.136 <sup>b</sup>       | 16.123±1.216 <sup>b</sup>  | 32.128±11.737 <sup>b</sup> | 16.248±1.387 <sup>a</sup>   | 6.180±0.423 <sup>b</sup>    |
| <b>Condition E</b>        |                               |                                 |                            |                            |                             |                             |
| E0 (1 <sup>st</sup> day)  | 938.035±1241.148 <sup>a</sup> | 1831.768±1922.327 <sup>a</sup>  | 4.249±4.046 <sup>a</sup>   | 42.947±63.688 <sup>a</sup> | 10.323±8.767 <sup>a</sup>   | 24.653±24.701 <sup>a</sup>  |
| E1 (14 <sup>th</sup> day) | 1235.740±201.471 <sup>a</sup> | 3922.320±605.098 <sup>a</sup>   | 2.084±0.555 <sup>a</sup>   | 24.652±2.479 <sup>a</sup>  | 8.656±2.758 <sup>a</sup>    | 18.800±7.039 <sup>a</sup>   |
| E2 (28 <sup>th</sup> day) | 1363.585±843.986 <sup>a</sup> | 4304.681±2294.927 <sup>a</sup>  | 2.975±1.739 <sup>a</sup>   | 37.720±22.497 <sup>a</sup> | 15.199±8.119 <sup>a</sup>   | 30.582±16.626 <sup>a</sup>  |
| <b>Condition F</b>        |                               |                                 |                            |                            |                             |                             |
| F0 (1 <sup>st</sup> day)  | 702.425±943.191 <sup>ab</sup> | 2408.180±2427.564 <sup>ab</sup> | 10.214±4.864 <sup>ab</sup> | 84.896±94.554 <sup>a</sup> | 22.714±18.898 <sup>ab</sup> | 51.315±44.861 <sup>ab</sup> |
| F1 (14 <sup>th</sup> day) | 1359.189±820.535 <sup>b</sup> | 4074.124±1111.216 <sup>b</sup>  | 4.764±1.238 <sup>b</sup>   | 42.108±16.200 <sup>a</sup> | 19.330±5.179 <sup>b</sup>   | 42.954±12.033 <sup>b</sup>  |
| F2 (28 <sup>th</sup> day) | 77.092±158.586 <sup>ac</sup>  | 480.307±891.473 <sup>ac</sup>   | 1.659±2.481 <sup>bc</sup>  | 8.220±14.150 <sup>a</sup>  | 1.923±1.668 <sup>bc</sup>   | 3.632±3.482 <sup>bc</sup>   |
| <b>Condition G</b>        |                               |                                 |                            |                            |                             |                             |
| G0 (1 <sup>st</sup> day)  | 22.786±26.056 <sup>a</sup>    | 1141.381±850.809 <sup>a</sup>   | 3.055±0.512 <sup>a</sup>   | 70.464±43.856 <sup>a</sup> | 18.257±4.669 <sup>a</sup>   | 20.742±4.972 <sup>a</sup>   |
| G1 (14 <sup>th</sup> day) | 2.915±4.695 <sup>a</sup>      | 110.938±167.432 <sup>b</sup>    | 0.590±0.168 <sup>b</sup>   | 23.399±5.982 <sup>b</sup>  | 2.783±1.662 <sup>b</sup>    | 4.286±2.267 <sup>b</sup>    |
| G2 (28 <sup>th</sup> day) | 0.561±1.203 <sup>a</sup>      | 10.916±19.501 <sup>b</sup>      | 0.015±0.044 <sup>c</sup>   | 0.428±0.204 <sup>b</sup>   | 0.038±0.017 <sup>b</sup>    | 0.159±0.066 <sup>b</sup>    |
| <b>Condition H</b>        |                               |                                 |                            |                            |                             |                             |
| H0 (1 <sup>st</sup> day)  | 2.885±0.097 <sup>a</sup>      | 8.209±0.212 <sup>a</sup>        | 3.393±1.697 <sup>a</sup>   | 5.561±2.774 <sup>a</sup>   | 5.421±1.123 <sup>a</sup>    | 2.170±0.261 <sup>a</sup>    |
| H1 (14 <sup>th</sup> day) | 0.020±0.005 <sup>b</sup>      | 0.051±0.008 <sup>b</sup>        | 0.082±0.009 <sup>b</sup>   | 0.096±0.010 <sup>b</sup>   | 0.035±0.004 <sup>b</sup>    | 0.037±0.003 <sup>b</sup>    |
| H2 (28 <sup>th</sup> day) | 1.828±0.430 <sup>c</sup>      | 0.247±0.080 <sup>b</sup>        | 0.391±0.137 <sup>b</sup>   | 0.460±0.139 <sup>b</sup>   | 0.294±0.108 <sup>b</sup>    | 0.274±0.110 <sup>b</sup>    |

- 2 \* Mean values with similar letters within columns for each condition of storages are not significantly different among the storage time points
- 3 (Turkey comparison test, P < 0.05)

1  
2

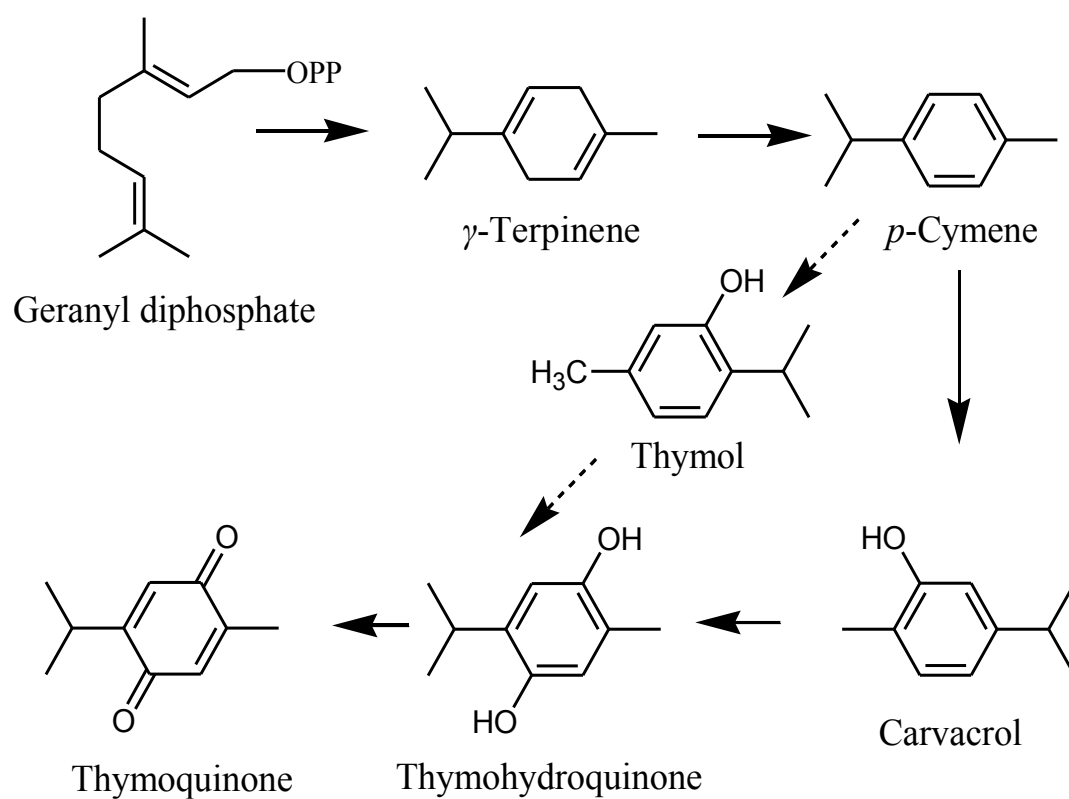

3

4

5

6 **Supplementary Material 4 Biosynthetic pathway of main of main constituents in *N.***  
7 ***sativa* (source : Botnick et al., 2012)**

Incubation temperature 80 degree

RT: 0.00 - 50.99

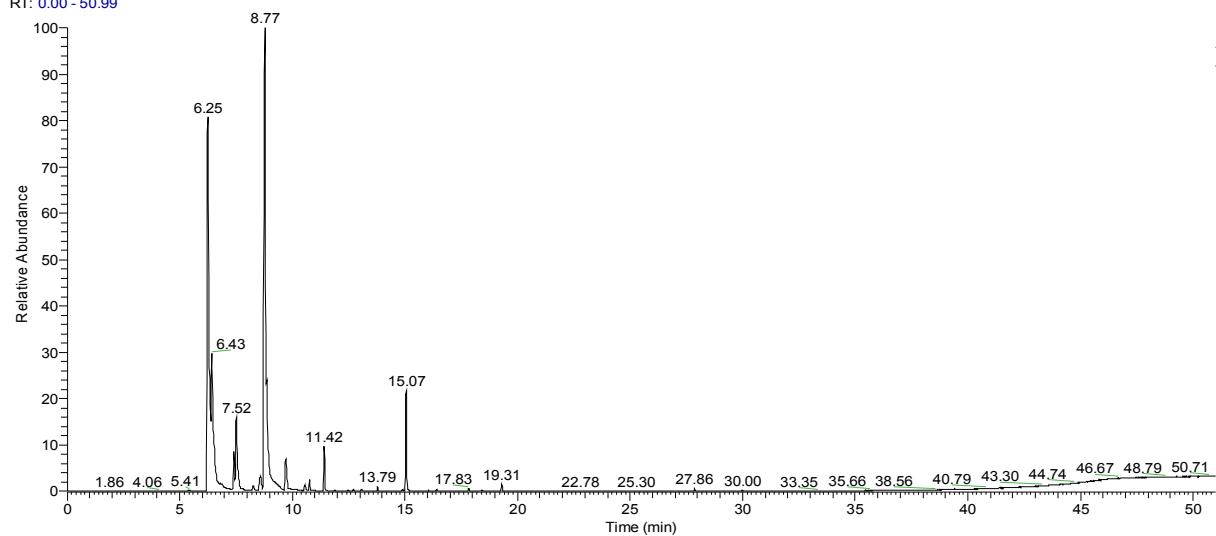

NL:  
1.49E9  
TIC MS  
test2

Incubation temperature 100 degree

RT: 0.00 - 50.99

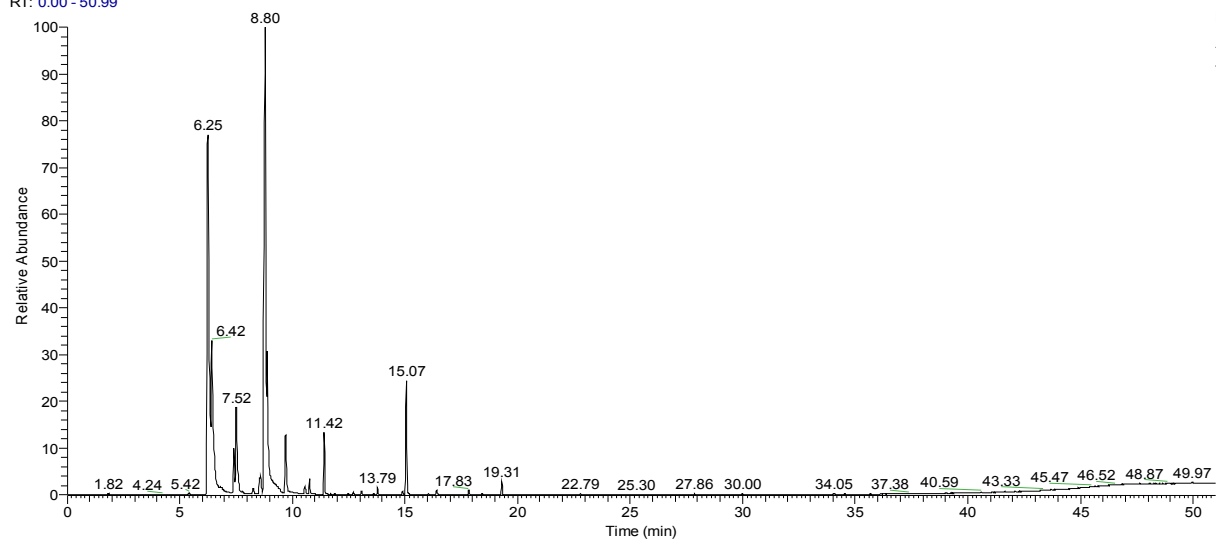

NL:  
1.81E9  
TIC MS  
test1

Incubation temperature 160 degree  
RT: 0.00 - 50.96

NL:  
3.29E9  
TIC MS  
test3

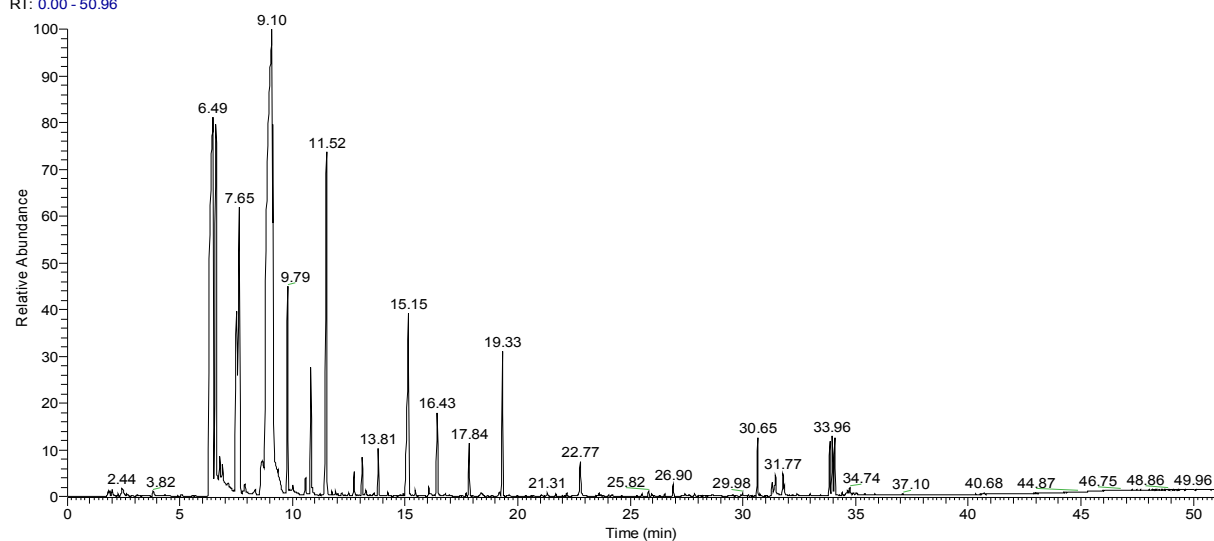

**Supplementary Material 5    Result of peak area from three different incubation temperature**

Mass spectrum of thymohydroquinone detected in Flavour and Fragrance Natural and Synthetic Compounds (FFNSC) version 1.3 library

<<Target>>

Line#:26 R.Time:39.961(Scan#:44354) Retention Index:1642 MassPeaks:229

RawMode:Averaged 39.960-39.962(44353-44355) BasePeak:151.05(22404)

BGMode:Calc. from Peak Group 1 - Event 1

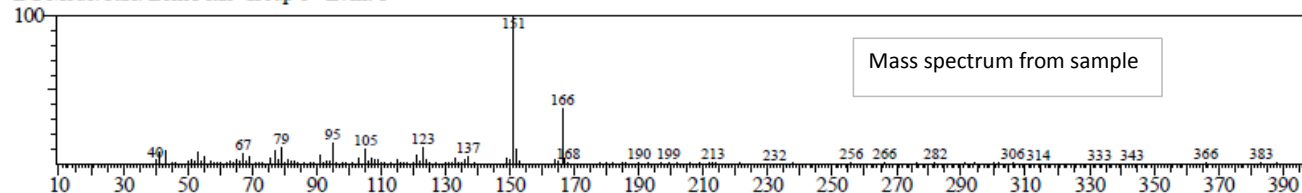

Hit#1 Entry:1823 Library:FFNSC1.3.lib

SI:90 Formula:C10H14O2 CAS:2217-60-9 MolWeight:166 RetIndex:1554

CompName:Thymohydroquinone

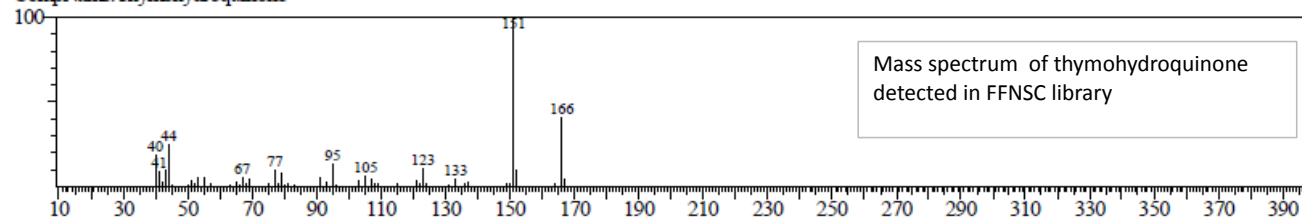

Hit#2 Entry:23517 Library:NIST11.lib

SI:86 Formula:C10H14O2 CAS:53651-61-9 MolWeight:166 RetIndex:1430

CompName:Phenol, 4-methoxy-2,3,6-trimethyl- \$\$ 4-Methoxy-2,3,6-trimethylphenol # \$\$

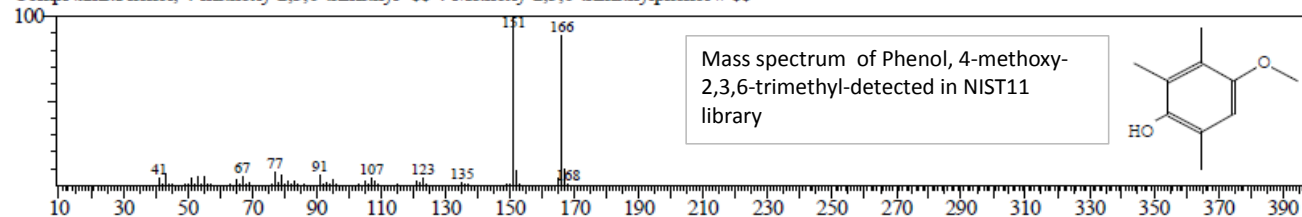

**Supplementary Material 6      The molecular weights and mass spectra of phenol,4-methoxy-2,3,6-trimethyl and thymohydroquinone**
